# Supplementary material for: Transcriptomic and Long-Term Behavioral Deficits Associated with Developmental 3.5 GHz Radiofrequency Radiation Exposures in Zebrafish
Source: PubMed Central journal article supplement — Environ Sci Technol Lett. 2022 Mar 3;9(4):327–32. doi: 10.1021/acs.estlett.2c00037 (PMC9009179; doi:10.1021/acs.estlett.2c00037), 2022-03-03
Supplement: ez2c00037_si_001.pdf [file ez2c00037_si_001.pdf]

## **Supplemental Information**

### **Transcriptomic and long-term behavioral deficits associated with developmental 3.5 GHz radiofrequency radiation exposures in zebrafish**

Subham Dasgupta<sup>1</sup>, Connor Leong<sup>1</sup>, Michael T. Simonich<sup>1</sup>, Lisa Truong<sup>1</sup>, Huaping Liu<sup>2</sup>, Robyn L. Tanguay<sup>1\*</sup>

<sup>1</sup>Sinnhuber Aquatic Research Laboratory, Department of Environmental and Molecular Toxicology, Oregon State University, Corvallis, United States of America

<sup>2</sup>School of Electrical Engineering and Computer Science, Oregon State University, Corvallis, Oregon, United States of America

\*Corresponding author: Robyn L. Tanguay

Email: [robyn.tanguay@oregonstate.edu](mailto:robyn.tanguay@oregonstate.edu)

Number of figures: 2

Number of tables: 8

### **RFR exposure setup**

Faraday cages (exposure chamber and sham control), that were fit to house a 6-well microtiter plate, were constructed with copper. The lid of the chamber was fitted with a Fractus (model FR05-107) ultra-wide band, omnidirectional antenna with a 3.1–5 GHz frequency range. The signal was generated using a transmitter (Analog Devices, model ADRV9364-Z7020) connected to a power amplifier (PA) (Mini-circuits ZHL-42+). Using a spectrum analyzer (Tektronix RSA3408A) with a 30 dBm measurement threshold, we performed preliminary assessments to measure the output from the PA. With a transmitter output of -9 dBm at 3.5 GHz, the PA output was 26.7 dBm. During our experiments, we set the transmitter to an output of -6 dBm at 3.5 GHz and expected a PA output of 30–32 dBm signal power. The amplified signal was administered to the zebrafish embryos via SMC cable connection from the PA to antenna attached to the RFR chamber.

### **Library preparation and sequencing**

The first step in the workflow involves purifying the poly-A containing mRNA molecules using poly-T oligo- attached magnetic beads. Following purification, the mRNA is fragmented into small pieces using divalent cations under elevated temperature. The cleaved RNA fragments are copied into first strand cDNA using reverse transcriptase and random primers. This is followed by second strand cDNA synthesis using DNA Polymerase I and RNase H. These cDNA fragments then have the addition of a single 'A' base and subsequent ligation of the adapter. The products are then purified and enriched with PCR amplification. We then quantified the PCR yield by Qubit and pooled samples together to make a single strand DNA circle (ssDNA circle), which gave the final library. DNA nanoballs (DNBs) were generated with the ssDNA circle by rolling circle replication (RCR) to enlarge the fluorescent signals at the sequencing process. The DNBs were loaded into the patterned nanoarrays and pair-end reads of 100 bp were read through on the DNBseq platform for the following data analysis study. For this step, the DNBseq platform combines the DNA nanoball-based nanoarrays and stepwise sequencing using Combinational Probe-Anchor Synthesis Sequencing Method. Overall strategy is illustrated in figure S1.

### **qRT-PCR**

Forward and reverse primers were designed within NCBI's Primer-BLAST and synthesized at Integrated DNA Technologies (Coralville, IA). Primers were validated by observation of size and specificity of bands via gel electrophoresis and melt curve analysis following qPCR reactions.

For qPCR, total RNA was extracted as described previously<sup>1</sup>. 10  $\mu\text{L}$  one-step qRT-PCR reactions were set up consisting of 5  $\mu\text{L}$  SYBR Green master Mix and 0.08  $\mu\text{L}$  reverse transcriptase enzyme mix (Power SYBR<sup>®</sup> Green RNA-to-CT<sup>™</sup> 1-Step Kit; Applied Biosystems, Foster City, CA), 0.2  $\mu\text{L}$  each of 10  $\mu\text{M}$  forward and reverse primers, and 20 ng RNA per reaction. The QuantStudio 5 Real-Time PCR System (Thermo Fisher Scientific, Waltham, MA) was used under the following cycling conditions; reverse transcription at 48  $^{\circ}\text{C}$  for 30 minutes, denaturation and activation of SYBR<sup>®</sup> polymerase at 95  $^{\circ}\text{C}$  for 10 minutes, followed by 40 cycles of amplification (95  $^{\circ}\text{C}$  for 15 seconds, 60  $^{\circ}\text{C}$  for 1 minute).

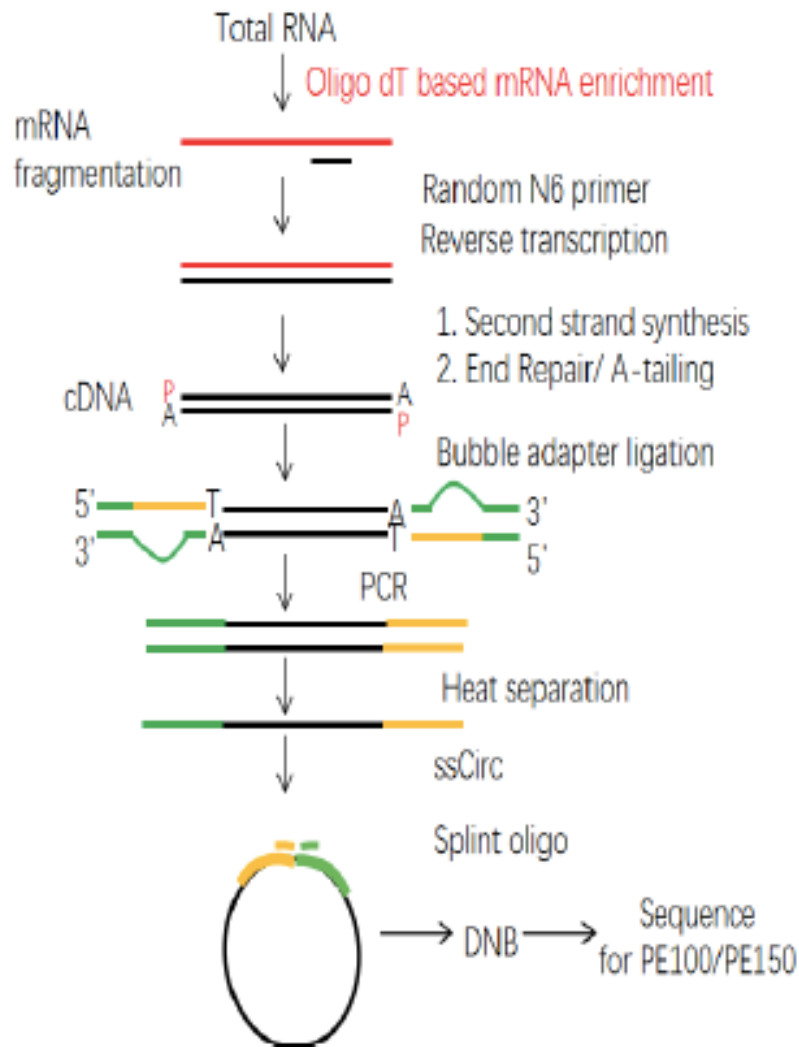

**Figure S1:** Library preparation for DNBSeq.

### Novel tank

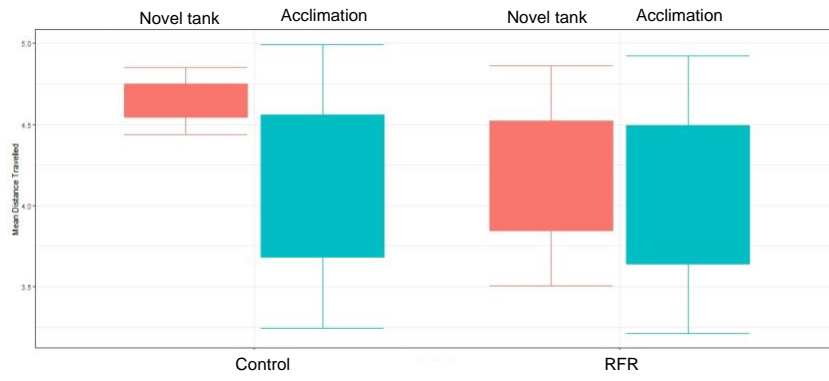

### Predator

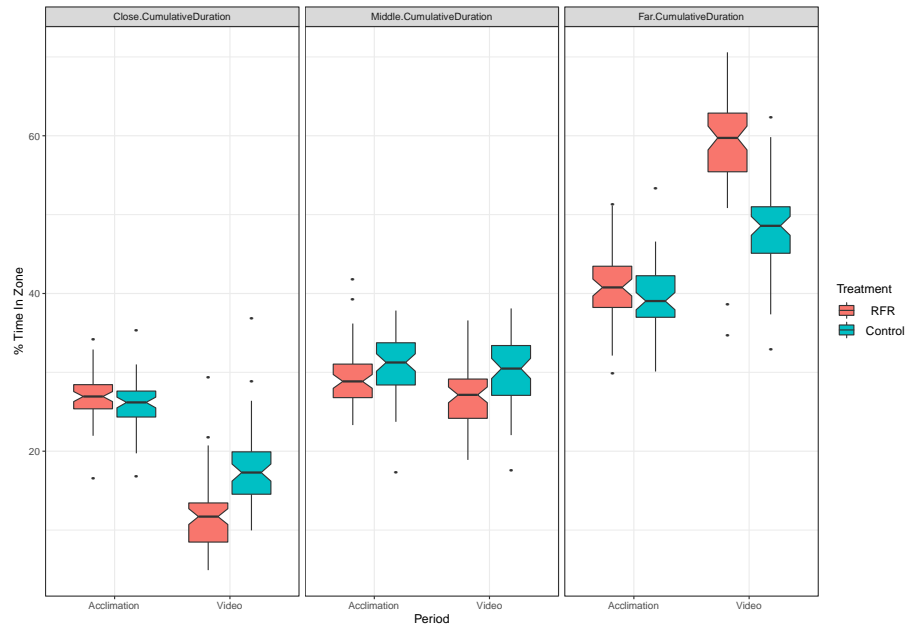

### Schooling

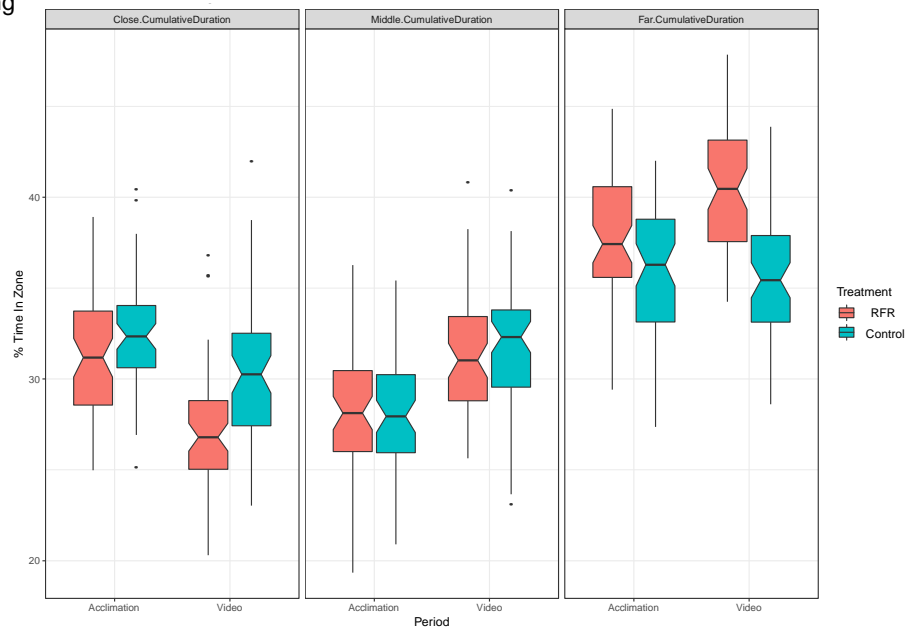

**Figure S2:** Mean distance travelled, and percent time spent in each zone during the novel tank, predator and schooling assays.

| Sample          | Reads(M) | Reads(M) | Bases(Gb) | Q20(%) | Q30(%) | Ratio(%) | Ratio(%) |
|-----------------|----------|----------|-----------|--------|--------|----------|----------|
| 5G_48hpf_1      | 47.48    | 47.03    | 4.7       | 97.63  | 89.73  | 99.06    | 0.15     |
| 5G_48hpf_2      | 47.48    | 46.87    | 4.69      | 97.88  | 90.71  | 98.73    | 0.15     |
| 5G_48hpf_3      | 47.48    | 46.66    | 4.67      | 97.8   | 90.42  | 98.28    | 0.18     |
| 5G_48hpf_4      | 40.18    | 39.6     | 3.96      | 97.86  | 90.83  | 98.55    | 0.3      |
| Control_48hpf_1 | 47.48    | 47.1     | 4.71      | 97.78  | 90.23  | 99.21    | 0.15     |
| Control_48hpf_2 | 47.48    | 46.69    | 4.67      | 97.8   | 90.35  | 98.35    | 0.15     |
| Control_48hpf_3 | 47.48    | 46.74    | 4.67      | 97.77  | 90.23  | 98.44    | 0.19     |
| Control_48hpf_4 | 49.97    | 48.93    | 4.89      | 97.91  | 91.08  | 97.92    | 0.27     |

**Table S1:** Sequencing reads and Quality scores for each replicate sample. 5G=RFR

| Sample          | Total CleanReads | Total MappingRatio | Uniquely MappingRatio |
|-----------------|------------------|--------------------|-----------------------|
| 5G_48hpf_1      | 47,030,410       | 87.79%             | 55.71%                |
| 5G_48hpf_2      | 46,871,520       | 87.99%             | 56.19%                |
| 5G_48hpf_3      | 46,660,940       | 86.28%             | 54.81%                |
| 5G_48hpf_4      | 39,603,976       | 86.35%             | 55.10%                |
| Control_48hpf_1 | 47,102,398       | 87.22%             | 55.05%                |
| Control_48hpf_2 | 46,690,566       | 87.36%             | 55.54%                |
| Control_48hpf_3 | 46,737,104       | 86.43%             | 54.64%                |
| Control_48hpf_4 | 48,933,040       | 86.89%             | 55.27%                |

**Table S2:** Sequencing clean reads and mapping to genome. 5G=RFR

| GeneID         | range(5G_48hpf/Cor) | Padj        | Symbol              |
|----------------|---------------------|-------------|---------------------|
| XR_002459562.1 | 3.699549726         | 2.62E-11    | <i>hnrnpdl</i>      |
| XR_002459782.1 | 2.071611427         | 0.028531519 | <i>LOC103911943</i> |
| 170783         | 1.70235286          | 0.02568343  | <i>mkrn2</i>        |
| 554157         | -1.343386872        | 1.37E-06    | <i>ctss2.1</i>      |
| 100537272      | -1.138405297        | 0.003231089 | <i>LOC100537272</i> |
| 791612         | -0.973093183        | 0.007407116 | <i>mat2ab</i>       |
| 335651         | -0.770299807        | 0.032964928 | <i>rbp4l</i>        |
| 266640         | -0.765009612        | 0.040819274 | <i>unc45b</i>       |
| 353179         | 0.755534151         | 0.040644698 | <i>otx5</i>         |
| 108179505      | -0.750811315        | 0.01313212  | <i>LOC108179505</i> |
| 393665         | 0.672852337         | 0.013091304 | <i>ndrg1b</i>       |
| XR_663224.3    | 0.608441649         | 0.003942241 | NA                  |
| 394021         | -0.608274497        | 0.000123723 | <i>shmt1</i>        |
| 449685         | -0.598107485        | 0.029812037 | <i>zgc:136410</i>   |
| 321928         | -0.586315538        | 0.007407116 | <i>phgdh</i>        |
| 327512         | -0.582518358        | 0.007407116 | <i>psat1</i>        |
| XR_222144.3    | -0.523167806        | 0.007407116 | NA                  |
| 334393         | -0.507966323        | 0.034116435 | <i>iars</i>         |
| 30314          | -0.46400709         | 0.011749663 | <i>apoeb</i>        |
| 100333269      | -0.439320064        | 0.028531519 | <i>aldh1l2</i>      |
| 282673         | -0.438069374        | 0.028531519 | <i>npc2</i>         |
| 324940         | -0.419354602        | 0.02568343  | <i>aars</i>         |
| 406739         | -0.38413495         | 0.040819274 | <i>pla2g12b</i>     |
| 563195         | -0.34812378         | 0.032964928 | <i>rrp12</i>        |
| 570653         | 0.345418623         | 0.029661332 | <i>fam117ba</i>     |
| 79375          | 0.309299407         | 0.032964928 | <i>foxclb</i>       |
| 436759         | -0.292600352        | 0.007407116 | <i>rpl38</i>        |
| 556556         | -0.275435508        | 0.034116435 | <i>rpl32</i>        |

**Table S3:** Differentially expressed genes ( $p_{adj} < 0.05$ ) at 48 hpf.

| Target         | Primer                      | sequence              |
|----------------|-----------------------------|-----------------------|
| <i>hnrnpdl</i> | UC4056_hnrnpdl_tvx2_F1      | CCTTGTTTGTACCTGCCAGC  |
|                | UC4057_hnrnpdl_tvx2_R1      | AAGTCAACCTGCCCACCACA  |
| LOC103911943   | UC4060_LOC103911943_tvx5_F1 | TGGCAGTGACTGGAAACCAA  |
|                | UC4061_LOC103911943_tvx5_R1 | CTGCCACAAGAATCCACTGC  |
| <i>mkrn2</i>   | UC4064_mkrn2_tvx1_F1        | CAGGAAGGCGGAATCAACGA  |
|                | UC4065_mkrn2_tvx1_R1        | ACACGCTCCTCTCTGGTAGT  |
| $\beta$ actin  | UC3716_beta-actin_new_F     | GATCAAGATCATTGCCCCACC |
|                | UC3716_beta-actin_new_R     | GAGTCGGCGTGAAGTGGTAA  |

**Table S4:** Primer sequences used for qPCR

**Novel tank-  
statistics**

|                  | Df | Sum Sq | Mean Sq | F value | Pr(>F) |
|------------------|----|--------|---------|---------|--------|
| Treatment        | 1  | 0.133  | 0.1330  | 0.133   | 0.734  |
| Status           | 1  | 0.208  | 0.2082  | 0.208   | 0.672  |
| Treatment:Status | 1  | 0.084  | 0.0845  | 0.084   | 0.786  |
| Residuals        | 4  | 4.004  | 1.0010  |         |        |

Tukey multiple comparisons of means  
95% family-wise confidence level

Fit: aov(formula = mean.dist ~ Treatment \* Status, data = (acc.sum))

\$Treatment

|         | diff       | lwr       | upr      | p adj     |
|---------|------------|-----------|----------|-----------|
| 5G-Ctrl | -0.2578953 | -2.222095 | 1.706304 | 0.7339074 |

\$Status

|                        | diff       | lwr       | upr      | p adj     |
|------------------------|------------|-----------|----------|-----------|
| Acclimation-Novel Tank | -0.3226562 | -2.286856 | 1.641543 | 0.6719936 |

\$`Treatment:Status`

|                                  | diff        | lwr       | upr      | p adj     |
|----------------------------------|-------------|-----------|----------|-----------|
| 5G:Novel Tank-Ctrl:Novel Tank    | -0.46341575 | -4.536236 | 3.609405 | 0.9633755 |
| Ctrl:Acclimation-Ctrl:Novel Tank | -0.52817673 | -4.600997 | 3.544644 | 0.9478282 |
| 5G:Acclimation-Ctrl:Novel Tank   | -0.58055149 | -4.653372 | 3.492269 | 0.9330468 |
| Ctrl:Acclimation-5G:Novel Tank   | -0.06476099 | -4.137581 | 4.008059 | 0.9998859 |
| 5G:Acclimation-5G:Novel Tank     | -0.11713574 | -4.189956 | 3.955685 | 0.9993288 |
| 5G:Acclimation-Ctrl:Acclimation  | -0.05237476 | -4.125195 | 4.020446 | 0.9999396 |

**Table S5:** 2-way ANOVA for Novel tank data. \*\*\* statistically significant



**Predator: Far zone-statistics**

|                      | Df    | Sum Sq   | Mean Sq | F value | Pr(>F)       |
|----------------------|-------|----------|---------|---------|--------------|
| Treatment            | 1     | 192957   | 192957  | 105.468 | < 2e-16 ***  |
| status               | 1     | 960000   | 960000  | 524.725 | < 2e-16 ***  |
| Sex                  | 1     | 138      | 138     | 0.075   | 0.7838       |
| Treatment:status     | 1     | 111744   | 111744  | 61.078  | 5.74e-15 *** |
| Treatment:Sex        | 1     | 261082   | 261082  | 142.704 | < 2e-16 ***  |
| status:Sex           | 1     | 8595     | 8595    | 4.698   | 0.0302 *     |
| Treatment:status:Sex | 1     | 1235     | 1235    | 0.675   | 0.4114       |
| Residuals            | 21508 | 39349496 | 1830    |         |              |

---

Signif. codes: 0 '\*\*\*' 0.001 '\*\*' 0.01 '\*' 0.05 '.' 0.1 ' ' 1

324 observations deleted due to missingness

Tukey multiple comparisons of means

95% family-wise confidence level

Fit: aov(formula = duration ~ Treatment \* status \* Sex, data = zone.only)

\$Treatment

|         | diff      | lwr       | upr       | p adj |
|---------|-----------|-----------|-----------|-------|
| Ctrl-5G | -5.989387 | -7.132512 | -4.846262 | 0     |

\$status

|                   | diff     | lwr      | upr      | p adj |
|-------------------|----------|----------|----------|-------|
| Video-Acclimation | 13.36144 | 12.21814 | 14.50474 | 0     |

\$Sex

|     | diff      | lwr        | upr      | p adj     |
|-----|-----------|------------|----------|-----------|
| M-F | 0.1598852 | -0.9833151 | 1.303085 | 0.7839865 |

\$`Treatment:status`

|                                 | diff      | lwr       | upr        | p adj     |
|---------------------------------|-----------|-----------|------------|-----------|
| Ctrl:Acclimation-5G:Acclimation | -1.324214 | -3.462413 | 0.8139845  | 0.3836521 |
| 5G:Video-5G:Acclimation         | 17.904725 | 15.788918 | 20.0205318 | 0.0000000 |
| Ctrl:Video-5G:Acclimation       | 7.463289  | 5.341967  | 9.5846114  | 0.0000000 |
| 5G:Video-Ctrl:Acclimation       | 19.228939 | 17.111496 | 21.3463814 | 0.0000000 |

|                             |            |            |            |           |
|-----------------------------|------------|------------|------------|-----------|
| Ctrl:Video-Ctrl:Acclimation | 8.787503   | 6.664550   | 10.9104566 | 0.0000000 |
| Ctrl:Video-5G:Video         | -10.441435 | -12.541835 | -8.3410361 | 0.0000000 |

\$`Treatment:Sex`

|               | diff        | lwr        | upr        | p adj     |
|---------------|-------------|------------|------------|-----------|
| Ctrl:F-5G:F   | -13.0533072 | -15.186978 | -10.919637 | 0.0000000 |
| 5G:M-5G:F     | -6.7818735  | -8.897946  | -4.665802  | 0.0000000 |
| Ctrl:M-5G:F   | -5.8905914  | -7.971177  | -3.810006  | 0.0000000 |
| 5G:M-Ctrl:F   | 6.2714337   | 4.111390   | 8.431478   | 0.0000000 |
| Ctrl:M-Ctrl:F | 7.1627158   | 5.037424   | 9.288007   | 0.0000000 |
| Ctrl:M-5G:M   | 0.8912821   | -1.216341  | 2.998905   | 0.6978247 |

\$`status:Sex`

|                             | diff       | lwr         | upr        | p adj     |
|-----------------------------|------------|-------------|------------|-----------|
| Video:F-Acclimation:F       | 12.082654  | 9.9504953   | 14.214814  | 0.0000000 |
| Acclimation:M-Acclimation:F | -1.125233  | -3.2635629  | 1.013096   | 0.5297121 |
| Video:M-Acclimation:F       | 13.484497  | 11.3656078  | 15.603385  | 0.0000000 |
| Acclimation:M-Video:F       | -13.207888 | -15.3280383 | -11.087737 | 0.0000000 |
| Video:M-Video:F             | 1.401842   | -0.6986994  | 3.502384   | 0.3159714 |
| Video:M-Acclimation:M       | 14.609730  | 12.5029256  | 16.716535  | 0.0000000 |

\$`Treatment:status:Sex`

|                                       | diff        | lwr        | upr         | p adj     |
|---------------------------------------|-------------|------------|-------------|-----------|
| Ctrl:Acclimation:F-5G:Acclimation:F   | -8.8329331  | -12.423054 | -5.2428124  | 0.0000000 |
| 5G:Video:F-5G:Acclimation:F           | 16.1970580  | 12.710581  | 19.6835351  | 0.0000000 |
| Ctrl:Video:F-5G:Acclimation:F         | -0.8892627  | -4.455854  | 2.6773290   | 0.9951819 |
| 5G:Acclimation:M-5G:Acclimation:F     | -8.5491231  | -12.115007 | -4.9832390  | 0.0000000 |
| Ctrl:Acclimation:M-5G:Acclimation:F   | -2.4562803  | -5.962797  | 1.0502362   | 0.3996935 |
| 5G:Video:M-5G:Acclimation:F           | 11.1334700  | 7.600793   | 14.6661468  | 0.0000000 |
| Ctrl:Video:M-5G:Acclimation:F         | 7.0547294   | 3.580482   | 10.5289774  | 0.0000000 |
| 5G:Video:F-Ctrl:Acclimation:F         | 25.0299911  | 21.475533  | 28.5844490  | 0.0000000 |
| Ctrl:Video:F-Ctrl:Acclimation:F       | 7.9436704   | 4.310597   | 11.5767442  | 0.0000000 |
| 5G:Acclimation:M-Ctrl:Acclimation:F   | 0.2838100   | -3.348569  | 3.9161892   | 0.9999979 |
| Ctrl:Acclimation:M-Ctrl:Acclimation:F | 6.3766528   | 2.802537   | 9.9507690   | 0.0000017 |
| 5G:Video:M-Ctrl:Acclimation:F         | 19.9664031  | 16.366618  | 23.5661883  | 0.0000000 |
| Ctrl:Video:M-Ctrl:Acclimation:F       | 15.8876626  | 12.345199  | 19.4301260  | 0.0000000 |
| Ctrl:Video:F-5G:Video:F               | -17.0863207 | -20.617012 | -13.5556295 | 0.0000000 |

a

|                                     |             |            |             |           |
|-------------------------------------|-------------|------------|-------------|-----------|
| 5G:Acclimation:M-5G:Video:F         | -24.7461811 | -28.276158 | -21.2162047 | 0.0000000 |
| Ctrl:Acclimation:M-5G:Video:F       | -18.6533383 | -22.123333 | -15.1833438 | 0.0000000 |
| 5G:Video:M-5G:Video:F               | -5.0635880  | -8.560016  | -1.5671600  | 0.0003045 |
| Ctrl:Video:M-5G:Video:F             | -9.1423286  | -12.579712 | -5.7049455  | 0.0000000 |
| 5G:Acclimation:M-Ctrl:Video:F       | -7.6598604  | -11.268986 | -4.0507348  | 0.0000000 |
| Ctrl:Acclimation:M-Ctrl:Video:F     | -1.5670176  | -5.117499  | 1.9834635   | 0.8844842 |
| 5G:Video:M-Ctrl:Video:F             | 12.0227327  | 8.446413   | 15.5990525  | 0.0000000 |
| Ctrl:Video:M-Ctrl:Video:F           | 7.9439921   | 4.425376   | 11.4626079  | 0.0000000 |
| Ctrl:Acclimation:M-5G:Acclimation:M | 6.0928428   | 2.543072   | 9.6426130   | 0.0000054 |
| 5G:Video:M-5G:Acclimation:M         | 19.6825931  | 16.106979  | 23.2582072  | 0.0000000 |
| Ctrl:Video:M-5G:Acclimation:M       | 15.6038525  | 12.085954  | 19.1217510  | 0.0000000 |
| 5G:Video:M-Ctrl:Acclimation:M       | 13.5897503  | 10.073340  | 17.1061610  | 0.0000000 |
| Ctrl:Video:M-Ctrl:Acclimation:M     | 9.5110097   | 6.053303   | 12.9687168  | 0.0000000 |
| Ctrl:Video:M-5G:Video:M             | -4.0787406  | -7.562974  | -0.5945067  | 0.0092652 |

### Predator: middle zone- statistics

|                      | Df    | Sum Sq   | Mean Sq | F value | Pr(>F)       |
|----------------------|-------|----------|---------|---------|--------------|
| Treatment            | 1     | 31525    | 31525   | 24.176  | 8.86e-07 *** |
| status               | 1     | 15949    | 15949   | 12.231  | 0.000471 *** |
| Sex                  | 1     | 3550     | 3550    | 2.722   | 0.098988 .   |
| Treatment:status     | 1     | 3788     | 3788    | 2.905   | 0.088314 .   |
| Treatment:Sex        | 1     | 17931    | 17931   | 13.751  | 0.000209 *** |
| status:Sex           | 1     | 311190   | 311190  | 238.643 | < 2e-16 ***  |
| Treatment:status:Sex | 1     | 4035     | 4035    | 3.094   | 0.078585 .   |
| Residuals            | 21508 | 28046445 | 1304    |         |              |

---

Signif. codes: 0 '\*\*\*' 0.001 '\*\*' 0.01 '\*' 0.05 '.' 0.1 ' ' 1

324 observations deleted due to missingness

Tukey multiple comparisons of means

95% family-wise confidence level

Fit: aov(formula = duration ~ Treatment \* status \* Sex, data = zone.only)

\$Treatment

|         | diff     | lwr      | upr     | p adj |
|---------|----------|----------|---------|-------|
| Ctrl-5G | 2.420931 | 1.455851 | 3.38601 | 8e-07 |

\$status

|                   | diff      | lwr       | upr        | p adj     |
|-------------------|-----------|-----------|------------|-----------|
| Video-Acclimation | -1.722218 | -2.687445 | -0.7569904 | 0.0004708 |

\$Sex

|     | diff       | lwr       | upr       | p adj     |
|-----|------------|-----------|-----------|-----------|
| M-F | -0.8118211 | -1.776964 | 0.1533219 | 0.0992241 |

\$`Treatment:status`

|                                 | diff       | lwr        | upr        | p adj     |
|---------------------------------|------------|------------|------------|-----------|
| Ctrl:Acclimation-5G:Acclimation | 1.5633606  | -0.2418063 | 3.3685275  | 0.1164775 |
| 5G:Video-5G:Acclimation         | -2.5587386 | -4.3450016 | -0.7724756 | 0.0013344 |
| Ctrl:Video-5G:Acclimation       | 0.6833116  | -1.1076074 | 2.4742306  | 0.7607244 |
| 5G:Video-Ctrl:Acclimation       | -4.1220992 | -5.9097429 | -2.3344555 | 0.0000000 |
| Ctrl:Video-Ctrl:Acclimation     | -0.8800490 | -2.6723451 | 0.9122472  | 0.5875382 |
| Ctrl:Video-5G:Video             | 3.2420502  | 1.4687952  | 5.0153052  | 0.0000156 |

\$`Treatment:Sex`

|               | diff       | lwr        | upr        | p adj     |
|---------------|------------|------------|------------|-----------|
| Ctrl:F-5G:F   | 4.3010015  | 2.4996573  | 6.1023457  | 0.0000000 |
| 5G:M-5G:F     | 1.0063134  | -0.7801732 | 2.7928000  | 0.4698075 |
| Ctrl:M-5G:F   | 1.6528827  | -0.1036443 | 3.4094097  | 0.0737964 |
| 5G:M-Ctrl:F   | -3.2946881 | -5.1182980 | -1.4710782 | 0.0000205 |
| Ctrl:M-Ctrl:F | -2.6481188 | -4.4423891 | -0.8538486 | 0.0008629 |
| Ctrl:M-5G:M   | 0.6465693  | -1.1327843 | 2.4259229  | 0.7867903 |

\$`status:Sex`

|                             | diff      | lwr         | upr        | p adj     |
|-----------------------------|-----------|-------------|------------|-----------|
| Video:F-Acclimation:F       | -9.415088 | -11.2151557 | -7.6150194 | 0.0000000 |
| Acclimation:M-Acclimation:F | -8.550064 | -10.3553410 | -6.7447861 | 0.0000000 |
| Video:M-Acclimation:F       | -2.759986 | -4.5488505  | -0.9711211 | 0.0004295 |
| Acclimation:M-Video:F       | 0.865024  | -0.9249058  | 2.6549538  | 0.6002731 |
| Video:M-Video:F             | 6.655102  | 4.8817266   | 8.4284768  | 0.0000000 |
| Video:M-Acclimation:M       | 5.790078  | 4.0114152   | 7.5687403  | 0.0000000 |

\$`Treatment:status:Sex`

|                                       | diff        | lwr         | upr        | p adj     |
|---------------------------------------|-------------|-------------|------------|-----------|
| Ctrl:Acclimation:F-5G:Acclimation:F   | 4.5914651   | 1.5605178   | 7.622412   | 0.0001195 |
| 5G:Video:F-5G:Acclimation:F           | -9.1353678  | -12.0788143 | -6.191921  | 0.0000000 |
| Ctrl:Video:F-5G:Acclimation:F         | -5.1854970  | -8.1965800  | -2.174414  | 0.0000049 |
| 5G:Acclimation:M-5G:Acclimation:F     | -5.8782503  | -8.8887359  | -2.867765  | 0.0000000 |
| Ctrl:Acclimation:M-5G:Acclimation:F   | -6.6750637  | -9.6354283  | -3.714699  | 0.0000000 |
| 5G:Video:M-5G:Acclimation:F           | -1.5136066  | -4.4960570  | 1.468844   | 0.7866550 |
| Ctrl:Video:M-5G:Acclimation:F         | 0.5156186   | -2.4175034  | 3.448741   | 0.9994885 |
| 5G:Video:F-Ctrl:Acclimation:F         | -13.7268329 | -16.7276720 | -10.725994 | 0.0000000 |
| Ctrl:Video:F-Ctrl:Acclimation:F       | -9.7769621  | -12.8441723 | -6.709752  | 0.0000000 |
| 5G:Acclimation:M-Ctrl:Acclimation:F   | -10.4697154 | -13.5363392 | -7.403092  | 0.0000000 |
| Ctrl:Acclimation:M-Ctrl:Acclimation:F | -11.2665288 | -14.2839642 | -8.249093  | 0.0000000 |
| 5G:Video:M-Ctrl:Acclimation:F         | -6.1050717  | -9.1441782  | -3.065965  | 0.0000000 |
| Ctrl:Video:M-Ctrl:Acclimation:F       | -4.0758465  | -7.0665592  | -1.085134  | 0.0009468 |
| Ctrl:Video:F-5G:Video:F               | 3.9498708   | 0.9690967   | 6.930645   | 0.0015268 |
| 5G:Acclimation:M-5G:Video:F           | 3.2571175   | 0.2769469   | 6.237288   | 0.0208094 |
| Ctrl:Acclimation:M-5G:Video:F         | 2.4603042   | -0.4692269  | 5.389835   | 0.1764532 |
| 5G:Video:M-5G:Video:F                 | 7.6217612   | 4.6699137   | 10.573609  | 0.0000000 |
| Ctrl:Video:M-5G:Video:F               | 9.6509865   | 6.7489874   | 12.552986  | 0.0000000 |
| 5G:Acclimation:M-Ctrl:Video:F         | -0.6927533  | -3.7397453  | 2.354239   | 0.9972971 |
| Ctrl:Acclimation:M-Ctrl:Video:F       | -1.4895666  | -4.4870482  | 1.507915   | 0.8043881 |
| 5G:Video:M-Ctrl:Video:F               | 3.6718904   | 0.6525945   | 6.691186   | 0.0055921 |
| Ctrl:Video:M-Ctrl:Video:F             | 5.7011157   | 2.7305363   | 8.671695   | 0.0000000 |
| Ctrl:Acclimation:M-5G:Acclimation:M   | -0.7968134  | -3.7936949  | 2.200068   | 0.9928481 |
| 5G:Video:M-5G:Acclimation:M           | 4.3646437   | 1.3459436   | 7.383344   | 0.0003145 |
| Ctrl:Video:M-5G:Acclimation:M         | 6.3938689   | 3.4238951   | 9.363843   | 0.0000000 |
| 5G:Video:M-Ctrl:Acclimation:M         | 5.1614570   | 2.1927392   | 8.130175   | 0.0000037 |
| Ctrl:Video:M-Ctrl:Acclimation:M       | 7.1906823   | 4.2715248   | 10.109840  | 0.0000000 |
| Ctrl:Video:M-5G:Video:M               | 2.0292253   | -0.9123273  | 4.970778   | 0.4206779 |

**Predator: close zone-statistics**

|                      | Df    | Sum Sq   | Mean Sq | F value | Pr(>F)       |
|----------------------|-------|----------|---------|---------|--------------|
| Treatment            | 1     | 31525    | 31525   | 24.176  | 8.86e-07 *** |
| status               | 1     | 15949    | 15949   | 12.231  | 0.000471 *** |
| Sex                  | 1     | 3550     | 3550    | 2.722   | 0.098988 .   |
| Treatment:status     | 1     | 3788     | 3788    | 2.905   | 0.088314 .   |
| Treatment:Sex        | 1     | 17931    | 17931   | 13.751  | 0.000209 *** |
| status:Sex           | 1     | 311190   | 311190  | 238.643 | < 2e-16 ***  |
| Treatment:status:Sex | 1     | 4035     | 4035    | 3.094   | 0.078585 .   |
| Residuals            | 21508 | 28046445 | 1304    |         |              |

---

Signif. codes: 0 '\*\*\*' 0.001 '\*\*' 0.01 '\*' 0.05 '.' 0.1 ' ' 1

324 observations deleted due to missingness

Tukey multiple comparisons of means

95% family-wise confidence level

Fit: aov(formula = duration ~ Treatment \* status \* Sex, data = zone.only)

\$Treatment

|         | diff     | lwr      | upr     | p adj |
|---------|----------|----------|---------|-------|
| Ctrl-5G | 2.420931 | 1.455851 | 3.38601 | 8e-07 |

\$status

|                   | diff      | lwr       | upr        | p adj     |
|-------------------|-----------|-----------|------------|-----------|
| Video-Acclimation | -1.722218 | -2.687445 | -0.7569904 | 0.0004708 |

\$Sex

|     | diff       | lwr       | upr       | p adj     |
|-----|------------|-----------|-----------|-----------|
| M-F | -0.8118211 | -1.776964 | 0.1533219 | 0.0992241 |

\$`Treatment:status`

|                                 | diff       | lwr        | upr        | p adj     |
|---------------------------------|------------|------------|------------|-----------|
| Ctrl:Acclimation-5G:Acclimation | 1.5633606  | -0.2418063 | 3.3685275  | 0.1164775 |
| 5G:Video-5G:Acclimation         | -2.5587386 | -4.3450016 | -0.7724756 | 0.0013344 |
| Ctrl:Video-5G:Acclimation       | 0.6833116  | -1.1076074 | 2.4742306  | 0.7607244 |
| 5G:Video-Ctrl:Acclimation       | -4.1220992 | -5.9097429 | -2.3344555 | 0.0000000 |
| Ctrl:Video-Ctrl:Acclimation     | -0.8800490 | -2.6723451 | 0.9122472  | 0.5875382 |
| Ctrl:Video-5G:Video             | 3.2420502  | 1.4687952  | 5.0153052  | 0.0000156 |

\$`Treatment:Sex`

|               | diff       | lwr        | upr        | p adj     |
|---------------|------------|------------|------------|-----------|
| Ctrl:F-5G:F   | 4.3010015  | 2.4996573  | 6.1023457  | 0.0000000 |
| 5G:M-5G:F     | 1.0063134  | -0.7801732 | 2.7928000  | 0.4698075 |
| Ctrl:M-5G:F   | 1.6528827  | -0.1036443 | 3.4094097  | 0.0737964 |
| 5G:M-Ctrl:F   | -3.2946881 | -5.1182980 | -1.4710782 | 0.0000205 |
| Ctrl:M-Ctrl:F | -2.6481188 | -4.4423891 | -0.8538486 | 0.0008629 |
| Ctrl:M-5G:M   | 0.6465693  | -1.1327843 | 2.4259229  | 0.7867903 |

\$`status:Sex`

|                             | diff      | lwr         | upr        | p adj     |
|-----------------------------|-----------|-------------|------------|-----------|
| Video:F-Acclimation:F       | -9.415088 | -11.2151557 | -7.6150194 | 0.0000000 |
| Acclimation:M-Acclimation:F | -8.550064 | -10.3553410 | -6.7447861 | 0.0000000 |
| Video:M-Acclimation:F       | -2.759986 | -4.5488505  | -0.9711211 | 0.0004295 |
| Acclimation:M-Video:F       | 0.865024  | -0.9249058  | 2.6549538  | 0.6002731 |
| Video:M-Video:F             | 6.655102  | 4.8817266   | 8.4284768  | 0.0000000 |
| Video:M-Acclimation:M       | 5.790078  | 4.0114152   | 7.5687403  | 0.0000000 |

\$`Treatment:status:Sex`

|                                       | diff        | lwr         | upr        | p adj     |
|---------------------------------------|-------------|-------------|------------|-----------|
| Ctrl:Acclimation:F-5G:Acclimation:F   | 4.5914651   | 1.5605178   | 7.622412   | 0.0001195 |
| 5G:Video:F-5G:Acclimation:F           | -9.1353678  | -12.0788143 | -6.191921  | 0.0000000 |
| Ctrl:Video:F-5G:Acclimation:F         | -5.1854970  | -8.1965800  | -2.174414  | 0.0000049 |
| 5G:Acclimation:M-5G:Acclimation:F     | -5.8782503  | -8.8887359  | -2.867765  | 0.0000000 |
| Ctrl:Acclimation:M-5G:Acclimation:F   | -6.6750637  | -9.6354283  | -3.714699  | 0.0000000 |
| 5G:Video:M-5G:Acclimation:F           | -1.5136066  | -4.4960570  | 1.468844   | 0.7866550 |
| Ctrl:Video:M-5G:Acclimation:F         | 0.5156186   | -2.4175034  | 3.448741   | 0.9994885 |
| 5G:Video:F-Ctrl:Acclimation:F         | -13.7268329 | -16.7276720 | -10.725994 | 0.0000000 |
| Ctrl:Video:F-Ctrl:Acclimation:F       | -9.7769621  | -12.8441723 | -6.709752  | 0.0000000 |
| 5G:Acclimation:M-Ctrl:Acclimation:F   | -10.4697154 | -13.5363392 | -7.403092  | 0.0000000 |
| Ctrl:Acclimation:M-Ctrl:Acclimation:F | -11.2665288 | -14.2839642 | -8.249093  | 0.0000000 |
| 5G:Video:M-Ctrl:Acclimation:F         | -6.1050717  | -9.1441782  | -3.065965  | 0.0000000 |
| Ctrl:Video:M-Ctrl:Acclimation:F       | -4.0758465  | -7.0665592  | -1.085134  | 0.0009468 |
| Ctrl:Video:F-5G:Video:F               | 3.9498708   | 0.9690967   | 6.930645   | 0.0015268 |
| 5G:Acclimation:M-5G:Video:F           | 3.2571175   | 0.2769469   | 6.237288   | 0.0208094 |
| Ctrl:Acclimation:M-5G:Video:F         | 2.4603042   | -0.4692269  | 5.389835   | 0.1764532 |
| 5G:Video:M-5G:Video:F                 | 7.6217612   | 4.6699137   | 10.573609  | 0.0000000 |

|                                     |            |            |           |           |
|-------------------------------------|------------|------------|-----------|-----------|
| Ctrl:Video:M-5G:Video:F             | 9.6509865  | 6.7489874  | 12.552986 | 0.0000000 |
| 5G:Acclimation:M-Ctrl:Video:F       | -0.6927533 | -3.7397453 | 2.354239  | 0.9972971 |
| Ctrl:Acclimation:M-Ctrl:Video:F     | -1.4895666 | -4.4870482 | 1.507915  | 0.8043881 |
| 5G:Video:M-Ctrl:Video:F             | 3.6718904  | 0.6525945  | 6.691186  | 0.0055921 |
| Ctrl:Video:M-Ctrl:Video:F           | 5.7011157  | 2.7305363  | 8.671695  | 0.0000000 |
| Ctrl:Acclimation:M-5G:Acclimation:M | -0.7968134 | -3.7936949 | 2.200068  | 0.9928481 |
| 5G:Video:M-5G:Acclimation:M         | 4.3646437  | 1.3459436  | 7.383344  | 0.0003145 |
| Ctrl:Video:M-5G:Acclimation:M       | 6.3938689  | 3.4238951  | 9.363843  | 0.0000000 |
| 5G:Video:M-Ctrl:Acclimation:M       | 5.1614570  | 2.1927392  | 8.130175  | 0.0000037 |
| Ctrl:Video:M-Ctrl:Acclimation:M     | 7.1906823  | 4.2715248  | 10.109840 | 0.0000000 |
| Ctrl:Video:M-5G:Video:M             | 2.0292253  | -0.9123273 | 4.970778  | 0.4206779 |

**Table S6:** 3-way ANOVA and number of fish for predator response data.

**Schooling: close zone-  
statistics**

|                      | Df    | Sum Sq   | Mean Sq | F value | Pr(>F)   |     |
|----------------------|-------|----------|---------|---------|----------|-----|
| Treatment            | 1     | 27285    | 27285   | 15.890  | 6.73e-05 | *** |
| status               | 1     | 55438    | 55438   | 32.286  | 1.35e-08 | *** |
| Sex                  | 1     | 578543   | 578543  | 336.935 | < 2e-16  | *** |
| Treatment:status     | 1     | 8683     | 8683    | 5.057   | 0.0245   | *   |
| Treatment:Sex        | 1     | 42508    | 42508   | 24.756  | 6.56e-07 | *** |
| status:Sex           | 1     | 107168   | 107168  | 62.413  | 2.92e-15 | *** |
| Treatment:status:Sex | 1     | 108213   | 108213  | 63.022  | 2.15e-15 | *** |
| Residuals            | 21243 | 36475844 | 1717    |         |          |     |

---

Signif. codes: 0 '\*\*\*' 0.001 '\*\*' 0.01 '\*' 0.05 '.' 0.1 ' ' 1

589 observations deleted due to missingness

Tukey multiple comparisons of means

95% family-wise confidence level

Fit: aov(formula = duration ~ Treatment \* status \* Sex, data = zone.only)

\$Treatment



|         | diff     | lwr      | upr      | p adj    |
|---------|----------|----------|----------|----------|
| Ctrl-5G | 2.266404 | 1.152002 | 3.380806 | 6.72e-05 |

\$status

|                   | diff      | lwr      | upr       | p adj |
|-------------------|-----------|----------|-----------|-------|
| Video-Acclimation | -3.230784 | -4.34527 | -2.116298 | 0     |

\$Sex

|     | diff      | lwr       | upr      | p adj |
|-----|-----------|-----------|----------|-------|
| M-F | -10.42832 | -11.54272 | -9.31392 | 0     |

\$`Treatment:status`

|                                 | diff       | lwr       | upr        | p adj     |
|---------------------------------|------------|-----------|------------|-----------|
| Ctrl:Acclimation-5G:Acclimation | 0.9754015  | -1.108865 | 3.0596681  | 0.6253357 |
| 5G:Video-5G:Acclimation         | -4.4933540 | -6.546348 | -2.4403605 | 0.0000000 |
| Ctrl:Video-5G:Acclimation       | -0.9604588 | -3.023065 | 1.1021476  | 0.6291417 |
| 5G:Video-Ctrl:Acclimation       | -5.4687555 | -7.538404 | -3.3991065 | 0.0000000 |
| Ctrl:Video-Ctrl:Acclimation     | -1.9358603 | -4.015045 | 0.1433246  | 0.0785885 |
| Ctrl:Video-5G:Video             | 3.5328952  | 1.485061  | 5.5807294  | 0.0000552 |

\$`Treatment:Sex`

|               | diff        | lwr        | upr        | p adj     |
|---------------|-------------|------------|------------|-----------|
| Ctrl:F-5G:F   | 5.5412813   | 3.459745   | 7.622817   | 0.0000000 |
| 5G:M-5G:F     | -7.6512547  | -9.704716  | -5.597793  | 0.0000000 |
| Ctrl:M-5G:F   | -7.7724366  | -9.799291  | -5.745582  | 0.0000000 |
| 5G:M-Ctrl:F   | -13.1925359 | -15.299988 | -11.085084 | 0.0000000 |
| Ctrl:M-Ctrl:F | -13.3137179 | -15.395254 | -11.232182 | 0.0000000 |
| Ctrl:M-5G:M   | -0.1211819  | -2.174643  | 1.932279   | 0.9987588 |

\$`status:Sex`

|                             | diff       | lwr         | upr        | p adj     |
|-----------------------------|------------|-------------|------------|-----------|
| Video:F-Acclimation:F       | 1.293229   | -0.7859074  | 3.372366   | 0.3796936 |
| Acclimation:M-Acclimation:F | -5.860212  | -7.9444418  | -3.775981  | 0.0000000 |
| Video:M-Acclimation:F       | -13.544454 | -15.6129292 | -11.475978 | 0.0000000 |
| Acclimation:M-Video:F       | -7.153441  | -9.2172097  | -5.089672  | 0.0000000 |
| Video:M-Video:F             | -14.837683 | -16.8855397 | -12.789826 | 0.0000000 |
| Video:M-Acclimation:M       | -7.684242  | -9.7372697  | -5.631214  | 0.0000000 |

\$`Treatment:status:Sex`

|                                       | diff       | lwr         | upr         | p adj     |
|---------------------------------------|------------|-------------|-------------|-----------|
| Ctrl:Acclimation:F-5G:Acclimation:F   | 8.737266   | 5.2291198   | 12.2454115  | 0.0000000 |
| 5G:Video:F-5G:Acclimation:F           | 4.213589   | 0.8313144   | 7.5958637   | 0.0039771 |
| Ctrl:Video:F-5G:Acclimation:F         | 6.685364   | 3.2181948   | 10.1525333  | 0.0000000 |
| 5G:Acclimation:M-5G:Acclimation:F     | 1.427724   | -2.0231714  | 4.8786201   | 0.9153992 |
| Ctrl:Acclimation:M-5G:Acclimation:F   | -4.663099  | -8.0759509  | -1.2502468  | 0.0009051 |
| 5G:Video:M-5G:Acclimation:F           | -12.262617 | -15.6931446 | -8.8320898  | 0.0000000 |
| Ctrl:Video:M-5G:Acclimation:F         | -6.546665  | -9.9271658  | -3.1661644  | 0.0000000 |
| 5G:Video:F-Ctrl:Acclimation:F         | -4.523677  | -8.0039365  | -1.0434167  | 0.0020869 |
| Ctrl:Video:F-Ctrl:Acclimation:F       | -2.051902  | -5.6147220  | 1.5109188   | 0.6569907 |
| 5G:Acclimation:M-Ctrl:Acclimation:F   | -7.309541  | -10.8565271 | -3.7625555  | 0.0000000 |
| Ctrl:Acclimation:M-Ctrl:Acclimation:F | -13.400364 | -16.9103482 | -9.8903807  | 0.0000000 |
| 5G:Video:M-Ctrl:Acclimation:F         | -20.999883 | -24.5270552 | -17.4727104 | 0.0000000 |
| Ctrl:Video:M-Ctrl:Acclimation:F       | -15.283931 | -18.7624666 | -11.8053948 | 0.0000000 |
| Ctrl:Video:F-5G:Video:F               | 2.471775   | -0.9671760  | 5.9107260   | 0.3646973 |
| 5G:Acclimation:M-5G:Video:F           | -2.785865  | -6.2084080  | 0.6366786   | 0.2095827 |
| Ctrl:Acclimation:M-5G:Video:F         | -8.876688  | -12.2608688 | -5.4925069  | 0.0000000 |
| 5G:Video:M-5G:Video:F                 | -16.476206 | -19.8782114 | -13.0742009 | 0.0000000 |
| Ctrl:Video:M-5G:Video:F               | -10.760254 | -14.1118070 | -7.4087012  | 0.0000000 |
| 5G:Acclimation:M-Ctrl:Video:F         | -5.257640  | -8.7641028  | -1.7511766  | 0.0001491 |
| Ctrl:Acclimation:M-Ctrl:Video:F       | -11.348463 | -14.8174917 | -7.8794340  | 0.0000000 |
| 5G:Video:M-Ctrl:Video:F               | -18.947981 | -22.4344006 | -15.4615618 | 0.0000000 |
| Ctrl:Video:M-Ctrl:Video:F             | -13.232029 | -16.6692354 | -9.7948228  | 0.0000000 |
| Ctrl:Acclimation:M-5G:Acclimation:M   | -6.090823  | -9.5435873  | -2.6380590  | 0.0000024 |
| 5G:Video:M-5G:Acclimation:M           | -13.690341 | -17.1605777 | -10.2201053 | 0.0000000 |
| Ctrl:Video:M-5G:Acclimation:M         | -7.974389  | -11.3951797 | -4.5535991  | 0.0000000 |
| 5G:Video:M-Ctrl:Acclimation:M         | -7.599518  | -11.0319252 | -4.1671114  | 0.0000000 |
| Ctrl:Video:M-Ctrl:Acclimation:M       | -1.883566  | -5.2659743  | 1.4988418   | 0.6952102 |
| Ctrl:Video:M-5G:Video:M               | 5.715952   | 2.3157105   | 9.1161937   | 0.0000096 |

**Schooling: middle zone-  
statistics**

|                      | Df    | Sum Sq   | Mean Sq | F value | Pr(>F)       |
|----------------------|-------|----------|---------|---------|--------------|
| Treatment            | 1     | 22       | 22      | 0.017   | 0.897        |
| status               | 1     | 61169    | 61169   | 45.540  | 1.53e-11 *** |
| Sex                  | 1     | 70806    | 70806   | 52.715  | 3.99e-13 *** |
| Treatment:status     | 1     | 864      | 864     | 0.643   | 0.422        |
| Treatment:Sex        | 1     | 1785     | 1785    | 1.329   | 0.249        |
| status:Sex           | 1     | 49629    | 49629   | 36.949  | 1.23e-09 *** |
| Treatment:status:Sex | 1     | 49       | 49      | 0.036   | 0.849        |
| Residuals            | 21243 | 28533082 | 1343    |         |              |

---

Signif. codes: 0 '\*\*\*' 0.001 '\*\*' 0.01 '\*' 0.05 '.' 0.1 ' ' 1

589 observations deleted due to missingness

Tukey multiple comparisons of means

95% family-wise confidence level

Fit: aov(formula = duration ~ Treatment \* status \* Sex, data = zone.only)

\$Treatment

|         | diff      | lwr        | upr      | p adj     |
|---------|-----------|------------|----------|-----------|
| Ctrl-5G | 0.0649238 | -0.9207056 | 1.050553 | 0.8972711 |

\$status

|                   | diff     | lwr     | upr      | p adj |
|-------------------|----------|---------|----------|-------|
| Video-Acclimation | 3.393673 | 2.40797 | 4.379377 | 0     |

\$Sex

|     | diff     | lwr      | upr      | p adj |
|-----|----------|----------|----------|-------|
| M-F | 3.648219 | 2.662589 | 4.633848 | 0     |

\$`Treatment:status`

|                                 | diff       | lwr       | upr      | p adj     |
|---------------------------------|------------|-----------|----------|-----------|
| Ctrl:Acclimation-5G:Acclimation | -0.3564340 | -2.199857 | 1.486989 | 0.9598212 |
| 5G:Video-5G:Acclimation         | 2.9953882  | 1.179625  | 4.811152 | 0.0001327 |
| Ctrl:Video-5G:Acclimation       | 3.4458208  | 1.621555  | 5.270086 | 0.0000072 |
| 5G:Video-Ctrl:Acclimation       | 3.3518222  | 1.521328  | 5.182316 | 0.0000151 |
| Ctrl:Video-Ctrl:Acclimation     | 3.8022547  | 1.963327  | 5.641183 | 0.0000006 |
| Ctrl:Video-5G:Video             | 0.4504325  | -1.360768 | 2.261633 | 0.9194032 |

\$`Treatment:Sex`

|               | diff       | lwr       | upr      | p adj     |
|---------------|------------|-----------|----------|-----------|
| Ctrl:F-5G:F   | 0.5111452  | -1.329862 | 2.352153 | 0.8918527 |
| 5G:M-5G:F     | 4.2259414  | 2.409764  | 6.042118 | 0.0000000 |
| Ctrl:M-5G:F   | 3.5768875  | 1.784242  | 5.369532 | 0.0000017 |
| 5G:M-Ctrl:F   | 3.7147962  | 1.850867  | 5.578725 | 0.0000017 |
| Ctrl:M-Ctrl:F | 3.0657423  | 1.224735  | 4.906750 | 0.0001111 |
| Ctrl:M-5G:M   | -0.6490540 | -2.465231 | 1.167123 | 0.7951454 |

\$`status:Sex`

|                             | diff      | lwr       | upr      | p adj     |
|-----------------------------|-----------|-----------|----------|-----------|
| Video:F-Acclimation:F       | 0.3078657 | -1.531020 | 2.146751 | 0.9733167 |
| Acclimation:M-Acclimation:F | 0.5393319 | -1.304059 | 2.382722 | 0.8759755 |
| Video:M-Acclimation:F       | 6.9566137 | 5.127157  | 8.786070 | 0.0000000 |
| Acclimation:M-Video:F       | 0.2314662 | -1.593827 | 2.056760 | 0.9880607 |
| Video:M-Video:F             | 6.6487480 | 4.837528  | 8.459968 | 0.0000000 |
| Video:M-Acclimation:M       | 6.4172818 | 4.601488  | 8.233076 | 0.0000000 |

\$`Treatment:status:Sex`

|                                       | diff        | lwr       | upr       | p adj     |
|---------------------------------------|-------------|-----------|-----------|-----------|
| Ctrl:Acclimation:F-5G:Acclimation:F   | 0.31997583  | -2.782792 | 3.422744  | 0.9999860 |
| 5G:Video:F-5G:Acclimation:F           | 0.11639065  | -2.875051 | 3.107832  | 1.0000000 |
| Ctrl:Video:F-5G:Acclimation:F         | 0.80844521  | -2.258081 | 3.874972  | 0.9932086 |
| 5G:Acclimation:M-5G:Acclimation:F     | 1.21885477  | -1.833279 | 4.270988  | 0.9291249 |
| Ctrl:Acclimation:M-5G:Acclimation:F   | 0.16250218  | -2.855984 | 3.180988  | 0.9999998 |
| 5G:Video:M-5G:Acclimation:F           | 7.26445035  | 4.230332  | 10.298569 | 0.0000000 |
| Ctrl:Video:M-5G:Acclimation:F         | 6.96473455  | 3.974862  | 9.954607  | 0.0000000 |
| 5G:Video:F-Ctrl:Acclimation:F         | -0.20358518 | -3.281690 | 2.874519  | 0.9999993 |
| Ctrl:Video:F-Ctrl:Acclimation:F       | 0.48846938  | -2.662655 | 3.639594  | 0.9997781 |
| 5G:Acclimation:M-Ctrl:Acclimation:F   | 0.89887894  | -2.238241 | 4.035999  | 0.9887763 |
| Ctrl:Acclimation:M-Ctrl:Acclimation:F | -0.15747365 | -3.261867 | 2.946920  | 0.9999999 |
| 5G:Video:M-Ctrl:Acclimation:F         | 6.94447452  | 3.824878  | 10.064071 | 0.0000000 |
| Ctrl:Video:M-Ctrl:Acclimation:F       | 6.64475871  | 3.568179  | 9.721338  | 0.0000000 |
| Ctrl:Video:F-5G:Video:F               | 0.69205457  | -2.349514 | 3.733623  | 0.9972838 |
| 5G:Acclimation:M-5G:Video:F           | 1.10246412  | -1.924593 | 4.129521  | 0.9561744 |
| Ctrl:Acclimation:M-5G:Video:F         | 0.04611154  | -2.947016 | 3.039239  | 1.0000000 |
| 5G:Video:M-5G:Video:F                 | 7.14805970  | 4.139167  | 10.156952 | 0.0000000 |

|                                     |             |           |           |           |
|-------------------------------------|-------------|-----------|-----------|-----------|
| Ctrl:Video:M-5G:Video:F             | 6.84834390  | 3.884074  | 9.812614  | 0.0000000 |
| 5G:Acclimation:M-Ctrl:Video:F       | 0.41040956  | -2.690870 | 3.511689  | 0.9999234 |
| Ctrl:Acclimation:M-Ctrl:Video:F     | -0.64594303 | -3.714114 | 2.422228  | 0.9983446 |
| 5G:Video:M-Ctrl:Video:F             | 6.45600514  | 3.372453  | 9.539557  | 0.0000000 |
| Ctrl:Video:M-Ctrl:Video:F           | 6.15628933  | 3.116264  | 9.196315  | 0.0000000 |
| Ctrl:Acclimation:M-5G:Acclimation:M | -1.05635259 | -4.110138 | 1.997433  | 0.9668830 |
| 5G:Video:M-5G:Acclimation:M         | 6.04559558  | 2.976357  | 9.114835  | 0.0000000 |
| Ctrl:Video:M-5G:Acclimation:M       | 5.74587978  | 2.720373  | 8.771386  | 0.0000001 |
| 5G:Video:M-Ctrl:Acclimation:M       | 7.10194817  | 4.066167  | 10.137729 | 0.0000000 |
| Ctrl:Video:M-Ctrl:Acclimation:M     | 6.80223236  | 3.810673  | 9.793792  | 0.0000000 |
| Ctrl:Video:M-5G:Video:M             | -0.29971580 | -3.307048 | 2.707617  | 0.9999889 |

### Schooling: far zone- statistics

|                      | Df    | Sum Sq   | Mean Sq | F value | Pr(>F)   |     |
|----------------------|-------|----------|---------|---------|----------|-----|
| Treatment            | 1     | 59610    | 59610   | 32.613  | 1.14e-08 | *** |
| status               | 1     | 7366     | 7366    | 4.030   | 0.044715 | *   |
| Sex                  | 1     | 186440   | 186440  | 102.002 | < 2e-16  | *** |
| Treatment:status     | 1     | 11992    | 11992   | 6.561   | 0.010432 | *   |
| Treatment:Sex        | 1     | 82944    | 82944   | 45.379  | 1.67e-11 | *** |
| status:Sex           | 1     | 27140    | 27140   | 14.848  | 0.000117 | *** |
| Treatment:status:Sex | 1     | 95188    | 95188   | 52.078  | 5.51e-13 | *** |
| Residuals            | 21243 | 38827998 | 1828    |         |          |     |

---

Signif. codes: 0 '\*\*\*' 0.001 '\*\*' 0.01 '\*' 0.05 '.' 0.1 ' ' 1

589 observations deleted due to missingness

Tukey multiple comparisons of means

95% family-wise confidence level

Fit: aov(formula = duration ~ Treatment \* status \* Sex, data = zone.only)

\$Treatment

| diff | lwr | upr | p adj |
|------|-----|-----|-------|
|------|-----|-----|-------|

Ctrl-5G -3.349922 -4.499694 -2.20015 0

\$status

|                   | diff     | lwr      | upr      | p adj     |
|-------------------|----------|----------|----------|-----------|
| Video-Acclimation | 1.177644 | 0.027785 | 2.327502 | 0.0447156 |

\$Sex

|     | diff     | lwr      | upr      | p adj |
|-----|----------|----------|----------|-------|
| M-F | 5.919924 | 4.770152 | 7.069697 | 0     |

\$`Treatment:status`

|                                 | diff       | lwr        | upr         | p adj     |
|---------------------------------|------------|------------|-------------|-----------|
| Ctrl:Acclimation-5G:Acclimation | -1.8244355 | -3.9748546 | 0.32598361  | 0.1288736 |
| 5G:Video-5G:Acclimation         | 2.6613472  | 0.5431938  | 4.77950069  | 0.0068417 |
| Ctrl:Video-5G:Acclimation       | -2.1685697 | -4.2966411 | -0.04049834 | 0.0438559 |
| 5G:Video-Ctrl:Acclimation       | 4.4857827  | 2.3504452  | 6.62112022  | 0.0000003 |
| Ctrl:Video-Ctrl:Acclimation     | -0.3441342 | -2.4893102 | 1.80104175  | 0.9763927 |
| Ctrl:Video-5G:Video             | -4.8299169 | -6.9427472 | -2.71708670 | 0.0000000 |

\$`Treatment:Sex`

|               | diff       | lwr         | upr       | p adj     |
|---------------|------------|-------------|-----------|-----------|
| Ctrl:F-5G:F   | -7.5885223 | -9.73612386 | -5.440921 | 0.0000000 |
| 5G:M-5G:F     | 2.0276740  | -0.09096193 | 4.146310  | 0.0665449 |
| Ctrl:M-5G:F   | 2.3489027  | 0.25771767  | 4.440088  | 0.0204010 |
| 5G:M-Ctrl:F   | 9.6161963  | 7.44185600  | 11.790537 | 0.0000000 |
| Ctrl:M-Ctrl:F | 9.9374250  | 7.78982346  | 12.085027 | 0.0000000 |
| Ctrl:M-5G:M   | 0.3212287  | -1.79740723 | 2.439865  | 0.9799350 |

\$`status:Sex`

|                             | diff      | lwr       | upr       | p adj     |
|-----------------------------|-----------|-----------|-----------|-----------|
| Video:F-Acclimation:F       | -1.097618 | -3.242744 | 1.047509  | 0.5535491 |
| Acclimation:M-Acclimation:F | 3.621148  | 1.470767  | 5.771530  | 0.0000896 |
| Video:M-Acclimation:F       | 7.041311  | 4.907184  | 9.175438  | 0.0000000 |
| Acclimation:M-Video:F       | 4.718766  | 2.589495  | 6.848036  | 0.0000000 |
| Video:M-Video:F             | 8.138929  | 6.026075  | 10.251782 | 0.0000000 |
| Video:M-Acclimation:M       | 3.420163  | 1.301974  | 5.538352  | 0.0001967 |

\$`Treatment:status:Sex`

|                                       | diff        | lwr         | upr        | p adj     |
|---------------------------------------|-------------|-------------|------------|-----------|
| Ctrl:Acclimation:F-5G:Acclimation:F   | -10.3569096 | -13.9764004 | -6.7374189 | 0.0000000 |
| 5G:Video:F-5G:Acclimation:F           | -3.6127493  | -7.1023738  | -0.1231248 | 0.0362779 |
| Ctrl:Video:F-5G:Acclimation:F         | -8.5429290  | -12.1201426 | -4.9657155 | 0.0000000 |
| 5G:Acclimation:M-5G:Acclimation:F     | -4.5052990  | -8.0657226  | -0.9448755 | 0.0031587 |
| Ctrl:Acclimation:M-5G:Acclimation:F   | 1.6569503   | -1.8642221  | 5.1781228  | 0.8452745 |
| 5G:Video:M-5G:Acclimation:F           | 4.7656633   | 1.2262546   | 8.3050721  | 0.0011672 |
| Ctrl:Video:M-5G:Acclimation:F         | -0.5951182  | -4.0829125  | 2.8926761  | 0.9995799 |
| 5G:Video:F-Ctrl:Acclimation:F         | 6.7441603   | 3.1534406   | 10.3348800 | 0.0000003 |
| Ctrl:Video:F-Ctrl:Acclimation:F       | 1.8139806   | -1.8619200  | 5.4898812  | 0.8100325 |
| 5G:Acclimation:M-Ctrl:Acclimation:F   | 5.8516106   | 2.1920472   | 9.5111740  | 0.0000345 |
| Ctrl:Acclimation:M-Ctrl:Acclimation:F | 12.0138600  | 8.3924730   | 15.6352470 | 0.0000000 |
| 5G:Video:M-Ctrl:Acclimation:F         | 15.1225730  | 11.4834518  | 18.7616941 | 0.0000000 |
| Ctrl:Video:M-Ctrl:Acclimation:F       | 9.7617914   | 6.1728504   | 13.3507324 | 0.0000000 |
| Ctrl:Video:F-5G:Video:F               | -4.9301797  | -8.4782794  | -1.3820800 | 0.0006694 |
| 5G:Acclimation:M-5G:Video:F           | -0.8925497  | -4.4237210  | 2.6386216  | 0.9947566 |
| Ctrl:Acclimation:M-5G:Video:F         | 5.2696996   | 1.7781083   | 8.7612910  | 0.0001296 |
| 5G:Video:M-5G:Video:F                 | 8.3784126   | 4.8684313   | 11.8883940 | 0.0000000 |
| Ctrl:Video:M-5G:Video:F               | 3.0176311   | -0.4402966  | 6.4755588  | 0.1399828 |
| 5G:Acclimation:M-Ctrl:Video:F         | 4.0376300   | 0.4198754   | 7.6553845  | 0.0164714 |
| Ctrl:Acclimation:M-Ctrl:Video:F       | 10.1998794  | 6.6207472   | 13.7790116 | 0.0000000 |
| 5G:Video:M-Ctrl:Video:F               | 13.3085923  | 9.7115176   | 16.9056671 | 0.0000000 |
| Ctrl:Video:M-Ctrl:Video:F             | 7.9478108   | 4.4015112   | 11.4941105 | 0.0000000 |
| Ctrl:Acclimation:M-5G:Acclimation:M   | 6.1622494   | 2.5998981   | 9.7246006  | 0.0000043 |
| 5G:Video:M-5G:Acclimation:M           | 9.2709624   | 5.6905845   | 12.8513402 | 0.0000000 |
| Ctrl:Video:M-5G:Acclimation:M         | 3.9101808   | 0.3808182   | 7.4395434  | 0.0178999 |
| 5G:Video:M-Ctrl:Acclimation:M         | 3.1087130   | -0.4326349  | 6.6500609  | 0.1348037 |
| Ctrl:Video:M-Ctrl:Acclimation:M       | -2.2520685  | -5.7418306  | 1.2376936  | 0.5119493 |
| Ctrl:Video:M-5G:Video:M               | -5.3607815  | -8.8689433  | -1.8526198 | 0.0000988 |

**Table S7:** 3-way ANOVA and number of fish for schooling data.

**Startle: Nested anova-  
statistics**

Error: Tap

|           | Df | Sum Sq | Mean Sq | F value | Pr(>F) |
|-----------|----|--------|---------|---------|--------|
| Treatment | 1  | 7.675  | 7.675   | 2.260   | 0.272  |
| Sex       | 1  | 3.989  | 3.989   | 1.175   | 0.392  |
| Residuals | 2  | 6.791  | 3.396   |         |        |

Error: Tap:Treatment

|           | Df | Sum Sq | Mean Sq | F value | Pr(>F)     |
|-----------|----|--------|---------|---------|------------|
| Treatment | 1  | 11.127 | 11.127  | 69.311  | 0.00363 ** |
| Sex       | 1  | 0.083  | 0.083   | 0.519   | 0.52339    |
| Residuals | 3  | 0.482  | 0.161   |         |            |

---

Signif. codes: 0 '\*\*\*' 0.001 '\*\*' 0.01 '\*' 0.05 '.' 0.1 ' ' 1

Error: Within

|           | Df  | Sum Sq | Mean Sq | F value | Pr(>F)       |
|-----------|-----|--------|---------|---------|--------------|
| Sex       | 1   | 237    | 236.82  | 35.06   | 4.59e-09 *** |
| Residuals | 875 | 5910   | 6.75    |         |              |

---

Signif. codes: 0 '\*\*\*' 0.001 '\*\*' 0.01 '\*' 0.05 '.' 0.1 ' ' 1

Startle: Posthoc

Tukey multiple comparisons of means  
95% family-wise confidence level

Fit: aov(formula = mean.distance ~ Treatment + Tap + Sex, data = (sum))

\$Treatment

|         | diff      | lwr        | upr       | p adj     |
|---------|-----------|------------|-----------|-----------|
| Ctrl-5G | 0.2231004 | -0.1188736 | 0.5650745 | 0.2007339 |

\$Tap

|     | diff        | lwr        | upr       | p adj     |
|-----|-------------|------------|-----------|-----------|
| 2-1 | -0.19360249 | -0.9449570 | 0.5577520 | 0.9555210 |
| 3-1 | -0.30854178 | -1.0620278 | 0.4449442 | 0.7963760 |
| 4-1 | -0.24445474 | -0.9979407 | 0.5090312 | 0.9018022 |
| 5-1 | -0.43969612 | -1.1910506 | 0.3116584 | 0.4979819 |
| 3-2 | -0.11493929 | -0.8684253 | 0.6385467 | 0.9936697 |
| 4-2 | -0.05085226 | -0.8043382 | 0.7026337 | 0.9997412 |
| 5-2 | -0.24609363 | -0.9974481 | 0.5052609 | 0.8986702 |



|     |             |            |           |           |
|-----|-------------|------------|-----------|-----------|
| 4-3 | 0.06408704  | -0.6915244 | 0.8196985 | 0.9993603 |
| 5-3 | -0.13115434 | -0.8846403 | 0.6223317 | 0.9895252 |
| 5-4 | -0.19524137 | -0.9487274 | 0.5582446 | 0.9546285 |

\$Sex

|     | diff     | lwr       | upr      | p adj |
|-----|----------|-----------|----------|-------|
| M-F | 1.033826 | 0.6918128 | 1.375839 | 0     |

**Table S8:** 2-way nested ANOVA for startle tap data. \*\*/\*\* statistically significant

**Reference:**

1. Dasgupta, S.; Dunham, C. L.; Truong, L.; Simonich, M. T.; Sullivan, C. M.; Tanguay, R. L., Phenotypically Anchored mRNA and miRNA Expression Profiling in Zebrafish Reveals Flame Retardant Chemical Toxicity Networks. *Frontiers in cell and developmental biology* **2021**, *9*, 654.
